# Supplementary material for: Sequencing of a Patient with Balanced Chromosome Abnormalities and Neurodevelopmental Disease Identifies Disruption of Multiple High Risk Loci by Structural Variation
Source: PubMed Central journal article supplement (PMC3953210; doi:10.1371/journal.pone.0090894), 2014-03-13
Supplement: pone.0090894.s003.pdf [file pone.0090894.s003.pdf]

**Table S1**

Male-pair sequencing-proposed structural variants of >10kb in size mapped to near or within annotated genes across the genome of the index patient (Ensembl 72)

| chromosome | variant no. | 5' boundary | 3' boundary | read depth | size [bp] | SV  | Ensembl ID      | gene start | gene end  | GeneName        | type          |
|------------|-------------|-------------|-------------|------------|-----------|-----|-----------------|------------|-----------|-----------------|---------------|
| chr1       | 1           | 2583845     | 2689336     | 38         | 105511    | DEL | ENSG00000215912 | 2667415    | 2718286   | TTC34           | intronic      |
| chr1       | 2           | 5256270     | 7261255     | 12         | 53595     | DEL | ENSG00000227077 | 7276715    | 7276715   | ENSG00000227207 | pseudogene    |
| chr1       | 3           | 10235140    | 102388152   | 9          | 17012     | DEL | ENSG00000162699 | 102358661  | 102359603 | DNAJA1P5        | pseudogene    |
| chr1       | 3           | 102351140   | 102368152   | 9          | 17012     | DEL | ENSG00000118733 | 102268130  | 102426286 | OLFM3           | intronic      |
| chr1       | 4           | 144891176   | 144908295   | 6          | 17119     | DEL | ENSG00000178104 | 144836157  | 145076186 | PDE4DIP         | intronic      |
| chr1       | 5           | 174792396   | 174805858   | 9          | 13462     | DEL | ENSG00000152061 | 174128548  | 174964445 | RABGAP1L        | intronic      |
| chr1       | 6           | 184810129   | 184825656   | 10         | 15527     | DEL | ENSG00000135842 | 184759858  | 184943682 | FAM129A         | intronic      |
| chr1       | 7           | 229607862   | 229820533   | 13         | 17151     | DEL | ENSG00000213028 | 229824746  | 229825651 | ENSG00000213028 | pseudogene    |
| chr1       | 8           | 247847031   | 247861292   | 11         | 14261     | DEL | ENSG00000235749 | 247830951  | 247910384 | ENSG00000235749 | intronic      |
| chr1       | 9           | 248048260   | 248062520   | 14         | 14260     | DEL | ENSG00000238243 | 248031277  | 248060449 | OR2W3           | intronic      |
| chr10      | 10          | 47018242    | 47064611    | 140        | 46369     | INV | ENSG00000150165 | 47011753   | 47174093  | ANXA8L1         | intronic      |
| chr10      | 11          | 111567051   | 111582236   | 17         | 15185     | DEL | ENSG00000224907 | 111567409  | 111567887 | ENSG00000224907 | pseudogene    |
| chr11      | 12          | 1910784     | 1964943     | 92         | 54159     | DEL | ENSG00000184682 | 1910375    | 1912084   | C11orf89        | unclear       |
| chr11      | 12          | 1910784     | 1964943     | 92         | 54159     | DEL | ENSG00000229671 | 1923877    | 1929145   | ENSG00000229671 | linc/transcr. |
| chr11      | 12          | 1910784     | 1964943     | 92         | 54159     | DEL | ENSG00000252187 | 1941339    | 1941488   | ENSG00000252187 | unclear       |
| chr11      | 12          | 1910784     | 1964943     | 92         | 54159     | DEL | ENSG00000130592 | 1872000    | 1913497   | LSP1            | unclear       |
| chr11      | 12          | 1910784     | 1964943     | 92         | 54159     | DEL | ENSG00000130595 | 1940792    | 1959936   | TNNT3           | unclear       |
| chr11      | 13          | 6088619     | 6101135     | 13         | 12516     | DEL | ENSG00000234895 | 6088103    | 6089016   | OR52X1P         | pseudogene    |
| chr11      | 14          | 29003837    | 29017896    | 19         | 14059     | DEL | ENSG00000249867 | 28724162   | 29085368  | ENSG00000249867 | intronic      |
| chr11      | 15          | 69088711    | 69141936    | 16         | 53225     | DEL | ENSG00000172927 | 69061605   | 69182494  | MEYOV           | intronic      |
| chr11      | 16          | 9285945     | 9293666     | 14         | 14021     | DEL | ENSG00000180773 | 92827341   | 9293130   | SLC35A4         | intronic      |
| chr11      | 17          | 101562129   | 101579339   | 17         | 17210     | DEL | ENSG00000137672 | 101322295  | 101743293 | TRPC6           | intronic      |
| chr11      | 18          | 114420698   | 114432410   | 7          | 11712     | DEL | ENSG00000095110 | 114392437  | 114430617 | NXPE1           | intronic      |
| chr12      | 19          | 11190412    | 11254341    | 12         | 63929     | DEL | ENSG00000256400 | 11249778   | 11249873  | ENSG00000256400 | unclear       |
| chr12      | 19          | 11190412    | 11254341    | 12         | 63929     | DEL | ENSG00000111215 | 10977559   | 11324212  | PRR4            | unclear       |
| chr12      | 19          | 11190412    | 11254341    | 12         | 63929     | DEL | ENSG00000212127 | 11090005   | 11324172  | TAS2R14         | unclear       |
| chr12      | 19          | 11190412    | 11254341    | 12         | 63929     | DEL | ENSG00000253774 | 11243886   | 11244912  | TAS2R43         | unclear       |
| chr12      | 19          | 11190412    | 11254341    | 12         | 63929     | DEL | ENSG00000228761 | 11213954   | 11214893  | TAS2R46         | unclear       |
| chr12      | 19          | 11190412    | 11254341    | 12         | 63929     | DEL | ENSG00000256019 | 11200931   | 11201855  | TAS2R63P        | unclear       |
| chr12      | 19          | 11190412    | 11254341    | 12         | 63929     | DEL | ENSG00000256274 | 11229368   | 11231770  | TAS2R64P        | unclear       |
| chr12      | 20          | 43016464    | 43030165    | 8          | 13701     | DEL | ENSG00000257510 | 43009305   | 43040300  | ENSG00000257510 | linc/transcr. |
| chr12      | 20          | 43016464    | 43030165    | 8          | 13701     | DEL | ENSG00000257687 | 43020810   | 43020939  | ENSG00000257687 | pseudogene    |
| chr12      | 21          | 45899907    | 45914382    | 12         | 14475     | DEL | ENSG00000257657 | 45912101   | 46004403  | ENSG00000257657 | intronic      |
| chr12      | 22          | 99792360    | 99808326    | 8          | 14466     | DEL | ENSG00000185046 | 99792360   | 99808326  | ANKS1B          | intronic      |
| chr13      | 23          | 51064709    | 51076629    | 10         | 11920     | DEL | ENSG00000176124 | 50656307   | 51297372  | LEU11           | intronic      |
| chr13      | 24          | 114323378   | 114427858   | 21         | 104480    | DEL | ENSG00000185974 | 114321594  | 114438637 | GRK1            | intronic      |
| chr15      | 25          | 29157401    | 29210439    | 13         | 53038     | DEL | ENSG00000034053 | 29129629   | 29410518  | APBA2           | intronic      |
| chr15      | 26          | 83547144    | 83562742    | 20         | 15698     | DEL | ENSG00000103942 | 83509838   | 83654661  | HOMER2          | intronic      |
| chr16      | 27          | 18828787    | 18843173    | 10         | 14386     | DEL | ENSG00000157106 | 18816175   | 18937776  | SHG1            | intronic      |
| chr16      | 28          | 75258269    | 75281293    | 35         | 25427     | INV | ENSG00000240338 | 75259972   | 75262828  | ENSG00000240338 | linc/transcr. |
| chr16      | 29          | 83666054    | 83681468    | 15         | 15414     | DEL | ENSG00000140945 | 82660408   | 83830204  | CDH13           | intronic      |
| chr17      | 30          | 21208079    | 21225633    | 20         | 17554     | DEL | ENSG00000034152 | 21187984   | 21218552  | MAD2K3          | intronic      |
| chr17      | 31          | 39199154    | 39216570    | 9          | 17416     | DEL | ENSG00000212725 | 39202793   | 39203568  | KRTAP2-1        | intergenic    |
| chr17      | 31          | 39199154    | 39216570    | 9          | 17416     | DEL | ENSG00000214518 | 39210750   | 39211482  | KRTAP2-2        | intergenic    |
| chr17      | 31          | 39199154    | 39216570    | 9          | 17416     | DEL | ENSG00000212724 | 39215495   | 39216344  | KRTAP2-3        | intergenic    |
| chr17      | 32          | 41136326    | 41408077    | 35         | 27452     | DEL | ENSG00000238266 | 41369826   | 41389898  | ENSG00000238266 | intronic      |
| chr17      | 33          | 41400914    | 41466407    | 19         | 65493     | INV | ENSG00000188825 | 41447213   | 41468567  | ENSG00000188825 | linc/transcr. |
| chr19      | 34          | 19829848    | 19843750    | 9          | 13902     | DEL | ENSG00000105708 | 19821280   | 19843906  | ZNF14           | intronic      |
| chr19      | 35          | 35847100    | 35867440    | 15         | 20340     | DEL | ENSG00000185897 | 35849362   | 35851387  | FFAR3           | intergenic    |
| chr19      | 35          | 35847100    | 35867440    | 15         | 20340     | DEL | ENSG00000126251 | 35861831   | 35863855  | GPRA2           | intergenic    |
| chr19      | 36          | 39259961    | 39284385    | 11         | 24424     | INV | ENSG00000182472 | 39220827   | 39260544  | CAPN12          | intronic      |
| chr19      | 37          | 52129340    | 52152491    | 28         | 24951     | DEL | ENSG00000243469 | 52152115   | 52152863  | RPLP5           | pseudogene    |
| chr19      | 37          | 52129340    | 52152491    | 28         | 24951     | DEL | ENSG00000254415 | 52145806   | 52150054  | SIGLEC14        | intronic      |
| chr19      | 37          | 52129340    | 52152491    | 28         | 24951     | DEL | ENSG00000105501 | 52114781   | 52150151  | SIGLEC5         | intronic      |
| chr19      | 38          | 54796983    | 54810383    | 9          | 13400     | DEL | ENSG00000240197 | 54797902   | 54798219  | ENSG00000240197 | pseudogene    |
| chr19      | 38          | 54796983    | 54810383    | 9          | 13400     | DEL | ENSG00000251431 | 54808714   | 54809423  | ENSG00000251431 | pseudogene    |
| chr19      | 38          | 54796983    | 54810383    | 9          | 13400     | DEL | ENSG00000170866 | 54799854   | 54809952  | LILRA3          | coding hit    |
| chr2       | 39          | 22346880    | 16219530    | 21         | 139849150 | INV | ENSG00000231200 | 22156208   | 22753977  | ENSG00000231200 | coding hit    |
| chr2       | 39          | 22346880    | 16219530    | 21         | 139849150 | INV | ENSG00000115233 | 16219530   | 16228328  | ENSG00000115233 | coding hit    |
| chr2       | 40          | 48847148    | 48862880    | 11         | 15732     | DEL | ENSG00000239995 | 48859995   | 48860492  | ENSG00000239995 | pseudogene    |
| chr2       | 40          | 48847148    | 48862880    | 11         | 15732     | DEL | ENSG00000242441 | 48844937   | 48860287  | TGF2A1L         | intronic      |
| chr2       | 40          | 48847148    | 48862880    | 11         | 15732     | DEL | ENSG00000138039 | 48859428   | 48862880  | LHCR            | intronic      |
| chr2       | 40          | 48847148    | 48862880    | 11         | 15732     | DEL | ENSG00000068781 | 48757064   | 49003654  | STON1-GTF2A1L   | intronic      |
| chr2       | 41          | 110105277   | 110255199   | 30         | 150242    | DEL | ENSG00000172985 | 109748004  | 110262207 | SH3RF3          | intronic      |
| chr2       | 41          | 14961623    | 14972424    | 24         | 10776     | DEL | ENSG00000168289 | 14962819   | 149683273 | KIF5C           | intronic      |
| chr2       | 43          | 185675948   | 188166401   | 24         | 2490453   | INV | ENSG00000224063 | 188786797  | 188419390 | ENSG00000224063 | linc/transcr. |
| chr2       | 43          | 185675948   | 188166401   | 24         | 2490453   | INV | ENSG00000170396 | 185463093  | 185804219 | ZNF804A         | coding hit    |
| chr2       | 44          | 242849529   | 243040821   | 13         | 191292    | DEL | ENSG00000220804 | 243030784  | 243102304 | ENSG00000220804 | linc/transcr. |
| chr2       | 44          | 242849529   | 243040821   | 13         | 191292    | DEL | ENSG00000226423 | 242967334  | 242968327 | ENSG00000226423 | intronic      |
| chr2       | 44          | 242849529   | 243040821   | 13         | 191292    | DEL | ENSG00000232002 | 242989846  | 243026289 | ENSG00000232002 | linc/transcr. |
| chr2       | 44          | 242849529   | 243040821   | 13         | 191292    | DEL | ENSG00000233964 | 24282814   | 243029373 | ENSG00000233964 | linc/transcr. |
| chr2       | 44          | 242849529   | 243040821   | 13         | 191292    | DEL | ENSG00000237940 | 242912834  | 242919427 | ENSG00000237940 | intronic      |
| chr2       | 44          | 242849529   | 243040821   | 13         | 191292    | DEL | ENSG00000261186 | 243029505  | 243030608 | ENSG00000261186 | linc/transcr. |
| chr21      | 45          | 42952285    | 43009493    | 14         | 57208     | DEL | ENSG00000223400 | 42948062   | 42953426  | ENSG00000223400 | intergenic    |
| chr22      | 46          | 24270522    | 24314151    | 17         | 43629     | DEL | ENSG00000206090 | 24282185   | 24284985  | ENSG00000206090 | pseudogene    |
| chr22      | 46          | 24270522    | 24314151    | 17         | 43629     | DEL | ENSG00000225282 | 24269087   | 24271761  | ENSG00000225282 | pseudogene    |
| chr22      | 46          | 24270522    | 24314151    | 17         | 43629     | DEL | ENSG00000228039 | 24305942   | 24306944  | ENSG00000228039 | pseudogene    |
| chr22      | 46          | 24270522    | 24314151    | 17         | 43629     | DEL | ENSG00000231271 | 242921025  | 24292229  | ENSG00000231271 | pseudogene    |
| chr22      | 46          | 24270522    | 24314151    | 17         | 43629     | DEL | ENSG00000099977 | 24313554   | 24322660  | DDT             | intergenic    |
| chr22      | 46          | 24270522    | 24314151    | 17         | 43629     | DEL | ENSG00000099974 | 24309089   | 24314721  | DDTL            | intergenic    |
| chr22      | 46          | 24270522    | 24314151    | 17         | 43629     | DEL | ENSG00000133433 | 24299601   | 24303373  | GSTT2B          | intronic      |
| chr3       | 47          | 82155221    | 8228706     | 10         | 13485     | DEL | ENSG00000227110 | 7994492    | 8653610   | LMCD1-AS1       | intronic      |
| chr3       | 48          | 20308321    | 20322485    | 10         | 14164     | DEL |                 |            |           |                 |               |
