# Supplementary material for: Sequencing of a Patient with Balanced Chromosome Abnormalities and Neurodevelopmental Disease Identifies Disruption of Multiple High Risk Loci by Structural Variation
Source: PubMed Central journal article supplement (PMC3953210; doi:10.1371/journal.pone.0090894), 2014-03-13
Supplement: pone.0090894.s004.pdf [file pone.0090894.s004.pdf]

Table S2

Homologous coding missense variants identified by deep sequencing of chromosomes 2 and der(2)

\*Allele frequencies

| variant no | GeneName | rsid       | chr  | start     | end       | REF | ALT | genotype | freq | depth | 1000G* | NHLBI6500* | GERP++   | EXONIC info         | Impact             | SIFT | PP2      |
|------------|----------|------------|------|-----------|-----------|-----|-----|----------|------|-------|--------|------------|----------|---------------------|--------------------|------|----------|
| 1          | TAF1B    | rs396190   | chr2 | 10043024  | 10043024  | G   | A   | hom      | 4.3  | 43    | 0.95   | 0.930801   | 3.27     | nonsynonymous       | TAF1B.NM_005890.e  | 0.38 | 0.970    |
| 2          | RAD51AP2 | rs7695414  | chr2 | 17695773  | 17695773  | G   | A   | hom      | 179  | 45    | 0.58   | 0.511569   | 2.29     | nonsynonymous       | RAD51AP2.NM_001144 | 0.53 | 0        |
| 3          | GEN1     | rs1812152  | chr2 | 17942775  | 17942775  | T   | A   | hom      | 177  | 47    | 0.79   | 0.671229   | n        | nonsynonymous       | GEN1.NM_0013000    | 0.47 | 0        |
| 4          | GEN1     | rs300175   | chr2 | 17964027  | 17964027  | G   | A   | hom      | 32   | 45    | 0.99   | 0.963546   | n        | nonsynonymous       | GEN1.NM_0013000    | 0.92 | 0        |
| 5          | GEN1     | rs300169   | chr2 | 17962518  | 17962518  | C   | T   | hom      | 153  | 44    | 0.91   | 0.617414   | n        | nonsynonymous       | GEN1.NM_0013000    | 0.92 | 0        |
| 6          | MATN3    | rs28939676 | chr2 | 20202930  | 20202930  | G   | A   | hom      | 205  | 29    | 0.01   | 0.011459   | 5.5      | nonsynonymous       | MATN3.NM_002381.x  | 0    | n        |
| 7          | POB      | rs584542   | chr2 | 21232803  | 21232803  | T   | C   | hom      | 209  | 43    | 0.97   | 0.981624   | n        | nonsynonymous       | POB.NM_000384.e    | 0.77 | 0.009    |
| 8          | POB      | rs584133   | chr2 | 21234575  | 21234575  | T   | C   | hom      | 157  | 38    | 1      | 0.999692   | n        | nonsynonymous       | POB.NM_000384.e    | 0.85 | 0        |
| 9          | GPR113   | rs7698929  | chr2 | 26534901  | 26534901  | G   | A   | hom      | 341  | 22    | 0.07   | 0.084915   | 5.18     | nonsynonymous       | GPR113.NM_001145   | 0.04 | 0.065    |
| 10         | GPR113   | rs2052937  | chr2 | 26536694  | 26536694  | C   | T   | hom      | 194  | 26    | 0.71   | 0.689835   | 3.47     | nonsynonymous       | GPR113.NM_001145   | 0.42 | 0        |
| 11         | ABHD1    | rs6715286  | chr2 | 27361948  | 27361948  | T   | G   | hom      | 118  | 26    | 0.99   | 0.983469   | n        | nonsynonymous       | ABHD1.NM_032604.x  | 1    | 0        |
| 12         | FAM179A  | rs1127202  | chr2 | 29240080  | 29240080  | A   | G   | hom      | 23   | 25    | 0.21   | 0.233414   | n        | nonsynonymous       | FAM179A.NM_19928   | 1    | n        |
| 13         | ALK      | rs1881420  | chr2 | 29416481  | 29416481  | T   | C   | hom      | 529  | 21    | 0.2    | 0.223538   | n        | nonsynonymous       | ALK.NM_004304.exo  | 0.31 | 0.123    |
| 14         | ALK      | rs1670283  | chr2 | 29416572  | 29416572  | T   | C   | hom      | 218  | 29    | 0.99   | 0.990312   | n        | nonsynonymous       | ALK.NM_004304.exo  | 1    | 0        |
| 15         | BIRC6    | rs60197015 | chr2 | 32687162  | 32687162  | G   | C   | hom      | 163  | 43    | 1      | n          | 5.64     | nonsynonymous       | BIRC6.NM_016252.e  | 1    | n        |
| 16         | BIRC6    | rs2398984  | chr2 | 32711708  | 32711708  | A   | T   | hom      | 95   | 41    | 0.58   | 0.658968   | 4.48     | nonsynonymous       | BIRC6.NM_016252.e  | 0.97 | n        |
| 17         | LTPB1    | rs4422143  | chr2 | 33585796  | 33585796  | T   | C   | hom      | 136  | 37    | 1      | 0.999923   | 4.89     | nonsynonymous       | LTPB1.NM_00116622  | 1    | 0        |
| 18         | SULT1B1  | rs1025833  | chr2 | 37406880  | 37406880  | C   | G   | hom      | 543  | 37    | 0.41   | 0.249731   | n        | nonsynonymous       | SULT1B1.NM_0011003 | 1    | 0        |
| 19         | CEBP2    | rs2098368  | chr2 | 37456032  | 37456032  | C   | T   | hom      | 39   | 40    | 0.93   | 0.879499   | n        | nonsynonymous       | CEBP2.NM_005760.x  | 1    | 0.127063 |
| 20         | RMDN2    | rs4670800  | chr2 | 38179134  | 38179134  | G   | A   | hom      | 59.5 | 51    | 1      | n          | 1.879438 | nonsynonymous       | RMDN2.NM_144713    | 0.77 | 0        |
| 21         | CYP11B1  | rs1800440  | chr2 | 38208139  | 38208139  | T   | C   | hom      | 36   | 39    | 0.1    | 0.134998   | 5.95     | nonsynonymous       | CYP11B1.NM_000104  | 0.01 | 0.903    |
| 22         | CYP11B1  | rs1058396  | chr2 | 38298203  | 38298203  | C   | G   | hom      | 157  | 39    | 0.61   | 0.445564   | 5.95     | nonsynonymous       | CYP11B1.NM_000104  | 0.34 | 0        |
| 23         | DHX57    | rs7698922  | chr2 | 39363244  | 39363244  | T   | C   | hom      | 87   | 49    | 0.6    | 0.635907   | n        | nonsynonymous       | DHX57.NM_196963.x  | 0.49 | 0        |
| 24         | EML4     | rs1020624  | chr2 | 42515388  | 42515388  | C   | G   | hom      | 140  | 46    | 0.85   | 0.917333   | 5.67     | nonsynonymous       | EML4.NM_00114507   | 0.85 | 0        |
| 25         | HAAO     | rs3816183  | chr2 | 43015719  | 43015719  | T   | C   | hom      | 222  | 22    | 0.62   | 0.793634   | 3.66     | nonsynonymous       | HAAO.NM_012205.e   | 1    | 0.067406 |
| 26         | ABO3B    | rs5844718  | chr2 | 44104925  | 44104925  | T   | C   | hom      | 58.3 | 35    | 0.89   | 0.837229   | n        | nonsynonymous       | ABO3B.NM_022437.x  | 1    | 0        |
| 27         | FSHR     | rs6165     | chr2 | 49191041  | 49191041  | C   | T   | hom      | 20   | 42    | 0.51   | 0.454636   | n        | nonsynonymous       | FSHR.NM_181446.e   | 0.42 | 0.07985  |
| 28         | PSME4    | rs805408   | chr2 | 54120025  | 54120025  | A   | T   | hom      | 38   | 45    | 0.3    | 0.271106   | 5.41     | nonsynonymous       | PSME4.NM_014614.x  | 0.75 | 0.709923 |
| 29         | CD207F3  | rs9257586  | chr2 | 54587586  | 54587586  | G   | A   | hom      | 4.81 | 39    | 0.33   | 0.761328   | 3.18     | nonsynonymous       | CD207F3.NM_0011002 | 1    | 0        |
| 30         | CLCH1    | rs14026    | chr2 | 55407734  | 55407734  | G   | A   | hom      | 1.5  | 1.5   | 0.51   | 0.511304   | n        | nonsynonymous       | CLCH1.NM_001193    | 1    | n        |
| 31         | CLCH1    | rs6716006  | chr2 | 55407754  | 55407754  | C   | T   | hom      | 172  | 44    | 0.97   | 0.982854   | 3.59     | nonsynonymous       | CLCH1.NM_0011355   | 1    | 0.438892 |
| 32         | MTF2     | rs11337    | chr2 | 55470115  | 55470115  | C   | T   | hom      | 153  | 35    | 0.68   | 0.690278   | 2.14     | nonsynonymous       | MTF2.NM_0010053e   | 1    | 0        |
| 33         | SMK2     | rs2043704  | chr2 | 55854540  | 55854540  | G   | A   | hom      | 189  | 33    | 0.9    | 0.919172   | n        | nonsynonymous       | SMK2.NM_0011229    | 1    | 0        |
| 34         | PNPT1    | rs762572   | chr2 | 55912120  | 55912120  | T   | C   | hom      | 21.8 | 29    | 0.38   | 0.446871   | n        | nonsynonymous       | PNPT1.NM_033109e   | 0.19 | 0        |
| 35         | KIAA1841 | n          | chr2 | 61381327  | 61381327  | G   | C   | hom      | 214  | 49    | n      | n          | n        | frameshift deletion | KIAA1841.NM_032520 | 1    | 0        |
| 36         | CD207F3  | rs1729674  | chr2 | 61389737  | 61389737  | T   | C   | hom      | 15   | 21    | 0.43   | 0.431137   | n        | nonsynonymous       | CD207F3.NM_0011437 | 0    | n        |
| 37         | USP34    | rs6722430  | chr2 | 61575308  | 61575308  | A   | G   | hom      | 179  | 35    | 0.99   | 0.985651   | 3.83     | nonsynonymous       | USP34.NM_014709e   | 0    | n        |
| 38         | ETAA1    | rs3770657  | chr2 | 67630980  | 67630980  | G   | A   | hom      | 49   | 45    | 0.72   | 0.761538   | 3.4      | nonsynonymous       | ETAA1.NM_019002.e  | 1    | 0        |
| 39         | ETAA1    | rs3770655  | chr2 | 67632125  | 67632125  | C   | G   | hom      | 54.3 | 47    | 0.73   | 0.775958   | n        | nonsynonymous       | ETAA1.NM_019002.e  | 0.82 | 0        |
| 40         | FILG1    | rs7619234  | chr2 | 70112724  | 70112724  | C   | T   | hom      | 127  | 21    | 0.97   | 0.992455   | 5.24     | nonsynonymous       | FILG1.NM_00100431  | 1    | 0        |
| 41         | CD207    | rs714326   | chr2 | 71058835  | 71058835  | A   | G   | hom      | 163  | 27    | 0.54   | 0.437219   | n        | nonsynonymous       | CD207.NM_015717.e  | 0.75 | 0.2      |
| 42         | ALMS1    | rs2037814  | chr2 | 73675669  | 73675669  | T   | G   | hom      | 50   | 32    | 0.86   | 0.880566   | n        | nonsynonymous       | ALMS1.NM_015120.x  | 0.14 | 0        |
| 43         | ALMS1    | rs2037814  | chr2 | 73675669  | 73675669  | T   | G   | hom      | 17   | 35    | 0.86   | 0.880566   | n        | nonsynonymous       | ALMS1.NM_015120.x  | 1    | 0.001    |
| 44         | NAT8     | rs4852974  | chr2 | 73927931  | 73927931  | A   | G   | hom      | 26.8 | 32    | 0.74   | 0.749227   | 3.18     | unknown             | UNKNOWN            | n    | n        |
| 45         | NAT8     | rs2010490  | chr2 | 73928008  | 73928008  | C   | G   | hom      | 31   | 29    | 0.58   | 0.561126   | 2.4      | unknown             | UNKNOWN            | n    | n        |
| 46         | POLR1A   | rs4832242  | chr2 | 86317037  | 86317037  | G   | C   | hom      | 37   | 44    | 0.76   | 0.787664   | n        | nonsynonymous       | POLR1A.NM_015425   | 0.62 | 0.001    |
| 47         | IMMT     | rs6408024  | chr2 | 86403924  | 86403924  | T   | C   | hom      | 39.8 | 23    | 0.98   | 0.990025   | 5.13     | nonsynonymous       | IMMT.NM_00110018   | 0.43 | 0        |
| 48         | KDM3A    | rs2030259  | chr2 | 86683642  | 86683642  | A   | G   | hom      | 138  | 27    | 0.85   | 0.801784   | 3.51     | nonsynonymous       | KDM3A.NM_0011466   | 0.95 | 0        |
| 49         | ASTL     | rs794958   | chr2 | 96795857  | 96795857  | T   | C   | hom      | 64.3 | 24    | 0.89   | 0.860531   | n        | nonsynonymous       | ASTL.NM_00102030   | 1    | 0        |
| 50         | ANKRD36  | rs20049616 | chr2 | 97623853  | 97623853  | G   | A   | hom      | 18   | 21    | 0.9    | 0.91972    | n        | nonsynonymous       | ANKRD36.NM_001161  | 1    | 0        |
| 51         | AF3      | rs4851223  | chr2 | 10034357  | 10034357  | C   | T   | hom      | 44   | 53    | 1      | n          | 5.26     | nonsynonymous       | AF3.NM_00102510    | 1    | 0        |
| 52         | RF38     | rs4851436  | chr2 | 10203849  | 10203849  | T   | A   | hom      | 218  | 46    | 0.89   | 0.947657   | 4.74     | nonsynonymous       | RF38.NM_00114569   | 0.29 | n        |
| 53         | TMEM182  | rs987987   | chr2 | 103431404 | 103431404 | T   | C   | hom      | 222  | 38    | 0.99   | 0.975012   | 2.93     | nonsynonymous       | TMEM182.NM_14446   | 1    | 0        |
| 54         | CC22     | rs9718928  | chr2 | 103909572 | 103909572 | T   | C   | hom      | 15   | 1     | 0.99   | 0.990025   | 5.13     | nonsynonymous       | CC22.NM_181453     | 0.66 | 0.071    |
| 55         | CKAP2L   | rs6713825  | chr2 | 113513825 | 113513825 | T   | C   | hom      | 210  | 34    | 0.97   | 0.940181   | n        | nonsynonymous       | CKAP2L.NM_152515   | 0.36 | 0.071    |
| 56         | IL36A    | rs895497   | chr2 | 113763575 | 113763575 | A   | G   | hom      | 43.5 | 43    | 0.82   | 0.725041   | n        | nonsynonymous       | IL36A.NM_014440.ex | 0.36 | 0        |
| 57         | DPF1B    | rs1429265  | chr2 | 115252960 | 115252960 | G   | A   | hom      | 127  | 21    | 0.97   | 0.992455   | 5.25     | nonsynonymous       | DPF1B.NM_020865    | 1    | 0        |
| 58         | CD207F6  | rs1052500  | chr2 | 120060082 | 120060082 | T   | C   | hom      | 40.5 | 55    | 0.66   | 0.724126   | n        | nonsynonymous       | CD207F6.NM_001017  | 0.6  | 0        |
| 59         | PCDP1    | rs2273058  | chr2 | 120388412 | 120388412 | G   | A   | hom      | 55.3 | 47    | 0.98   | 0.977241   | n        | nonsynonymous       | PCDP1.NM_0012170   | 0.77 | 0.002    |
| 60         | TMEM177  | rs1863496  | chr2 | 120439220 | 120439220 | C   | G   | hom      | 27   | 22    | 0.78   | 0.771106   | n        | nonsynonymous       | TMEM177.NM_00110   | 0.81 | 0        |
| 61         | TUSK2    | rs3849411  | chr2 | 120949411 | 120949411 | G   | A   | hom      | 76.3 | 24    | 0.9    | 0.947769   | 2.64     | nonsynonymous       | TUSK2.NM_002712    | 0    | n        |
| 62         | POTE1    | rs489872   | chr2 | 131212170 | 131212170 | C   | T   | hom      | 29.8 | 22    | n      | n          | n        | nonsynonymous       | POTE1.NM_0012744   | 0    | n        |
| 63         | RSHD1    | rs961360   | chr2 | 136393658 | 136393658 | A   | G   | hom      | 22.8 | 58    | 0.31   | 0.183377   | 5.58     | nonsynonymous       | RSHD1.NM_015136    | 0.36 | 0.578    |
| 64         | LCT      | rs3675479  | chr2 | 13657554  | 13657554  | C   | T   | hom      | 25.8 | 23    | 0.98   | 0.979395   | 5.53     | nonsynonymous       | LCT.NM_002299.exo  | 1    | 0        |
| 65         | LCT      | rs3754689  | chr2 | 136590746 | 136590746 | A   | T   | hom      | 160  | 29    | 0.34   | 0.27026    | 6.21     | nonsynonymous       | LCT.NM_002299.exo  | 1    | 0.024    |
| 66         | NEB      | rs6        |      |           |           |     |     |          |      |       |        |            |          |                     |                    |      |          |
